# Supplementary material
Source: PubMed Central journal article supplement (PMC7653571)
Supplement: ajtr0012-6841-f8.pdf [file ajtr0012-6841-f8.pdf]

## m5C regulators in HNSCC

**Supplementary Table 1.** Functional-annotation statistics for m5C-regulating genes in HNSCC samples

| Hugo Symbol | Frame Shift Del | Frame Shift Ins | In Frame Del | Missense Mutation | Nonsense Mutation | Splice Site | Total | Mutated Samples | Altered Samples |
|-------------|-----------------|-----------------|--------------|-------------------|-------------------|-------------|-------|-----------------|-----------------|
| DNMT3B      | 0               | 0               | 0            | 8                 | 1                 | 0           | 9     | 9               | 9               |
| DNMT3A      | 0               | 0               | 0            | 9                 | 0                 | 0           | 9     | 8               | 8               |
| TET2        | 0               | 0               | 1            | 2                 | 4                 | 0           | 7     | 7               | 7               |
| DNMT1       | 0               | 0               | 0            | 6                 | 0                 | 0           | 6     | 6               | 6               |
| NSUN2       | 0               | 0               | 0            | 6                 | 0                 | 0           | 6     | 6               | 6               |
| NSUN6       | 0               | 0               | 0            | 3                 | 1                 | 0           | 4     | 4               | 4               |
| NSUN7       | 0               | 1               | 0            | 3                 | 0                 | 0           | 4     | 3               | 3               |
| NSUN5       | 0               | 0               | 0            | 3                 | 0                 | 0           | 3     | 3               | 3               |
| NSUN3       | 0               | 0               | 0            | 3                 | 0                 | 0           | 3     | 2               | 2               |
| ALYREF      | 0               | 0               | 0            | 1                 | 0                 | 1           | 2     | 2               | 2               |
| NSUN4       | 1               | 0               | 0            | 1                 | 0                 | 0           | 2     | 2               | 2               |

**Supplementary Table 2.** Copy-number variation statistics for m5C-regulating genes in HNSCC samples

| Function | Genes  | Diploid | Deletion | Amplification | CNV sum | Amplification % | Deletion % | Percentage |   |
|----------|--------|---------|----------|---------------|---------|-----------------|------------|------------|---|
| writer   | NSUN1  | -       | -        | -             | -       | -               | -          | -          |   |
|          | NSUN2  | 326     | 12       | 186           | 524     | 35.50%          | 2.29%      | 61.65%     |   |
|          | NSUN3  | 335     | 23       | 168           | 526     | 31.94%          | 4.37%      | 61.09%     |   |
|          | NSUN4  | 456     | 33       | 34            | 523     | 6.50%           | 6.31%      | 53.42%     |   |
|          | NSUN5  | 424     | 28       | 66            | 518     | 12.74%          | 5.41%      | 54.99%     |   |
|          | NSUN6  | 383     | 110      | 33            | 526     | 6.27%           | 20.91%     | 57.87%     |   |
|          | NSUN7  | 363     | 136      | 27            | 526     | 5.13%           | 25.86%     | 59.17%     |   |
|          | DNMT1  | 434     | 59       | 32            | 91      | 35.16%          | 64.84%     | 17.33%     |   |
|          | DNMT2  | -       | -        | -             | -       | -               | -          | -          | - |
|          | DNMT3A | 465     | 14       | 44            | 58      | 75.86%          | 24.14%     | 11.09%     |   |
| DNMT3B   | 369    | 9       | 154      | 163           | 94.48%  | 5.52%           | 30.64%     |            |   |
| eraser   | TET2   | 418     | 94       | 14            | 108     | 12.96%          | 87.04%     | 20.53%     |   |
| reader   | ALYREF | 423     | 41       | 58            | 99      | 58.59%          | 41.41%     | 18.97%     |   |

**Supplementary Table 3.** The relationship between different expression levels in m5C-regulatory genes and patient prognoses

| Genes  | beta    | HR (95% CI for HR) | wald.test | p.value |
|--------|---------|--------------------|-----------|---------|
| DNMT1  | -0.031  | 0.97 (0.95-0.99)   | 7.9       | 0.005   |
| TET2   | -0.13   | 0.87 (0.77-0.99)   | 4.3       | 0.038   |
| NSUN6  | -0.15   | 0.86 (0.75-0.99)   | 4.2       | 0.04    |
| DNMT3A | -0.081  | 0.92 (0.85-1)      | 3.3       | 0.071   |
| NSUN7  | -0.21   | 0.81 (0.62-1)      | 2.6       | 0.11    |
| NSUN5  | 0.014   | 1 (0.99-1)         | 0.93      | 0.34    |
| NSUN2  | 0.0075  | 1 (0.99-1)         | 0.85      | 0.36    |
| DNMT3B | -0.02   | 0.98 (0.92-1)      | 0.32      | 0.57    |
| ALYREF | -0.0016 | 1 (0.99-1)         | 0.28      | 0.6     |
